# Supplementary material for: Integrated systems analysis reveals a molecular network underlying autism spectrum disorders
Source: PubMed Central journal article supplement (PMC4300495; doi:10.15252/msb.20145487), 2014-12-30

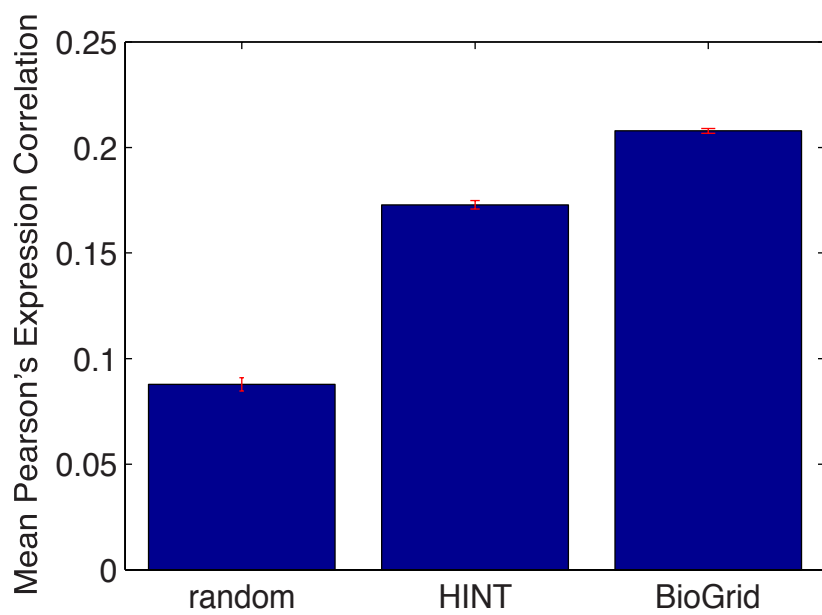

Supplement: msb0010-0774-sd2.pdf [file msb0010-0774-sd2.pdf]
