# Supplementary material for: Integrated systems analysis reveals a molecular network underlying autism spectrum disorders
Source: PubMed Central journal article supplement (PMC4300495; doi:10.15252/msb.20145487), 2014-12-30
Supplement: msb0010-0774-sd15.pdf [file msb0010-0774-sd15.pdf]

**Table S1. Validation for the enrichment of ASD genes in this module**

|                               | <b>Validation method</b>                                                                                                                                                                                                                                                                                                                                                                                                                         | <b>Dataset</b>                                                          | <b>Conclusion</b>                                                                                                                |
|-------------------------------|--------------------------------------------------------------------------------------------------------------------------------------------------------------------------------------------------------------------------------------------------------------------------------------------------------------------------------------------------------------------------------------------------------------------------------------------------|-------------------------------------------------------------------------|----------------------------------------------------------------------------------------------------------------------------------|
| <b>SFARI-based validation</b> | Comparing with the human synaptome background                                                                                                                                                                                                                                                                                                                                                                                                    | synaptomeDB<br>SFARI                                                    | Our module is <b>more enriched</b> for ASD genes than that of genes in the synaptome background (P=3.28e-8, Fisher's exact test) |
|                               | Enrichment of the <b>non-synaptic</b> genes in module                                                                                                                                                                                                                                                                                                                                                                                            | synaptomeDB<br>SFARI                                                    | Genes in our module <b>not annotated as synaptic genes</b> also showed enrichment for ASD genes (P=1.64e-4, hypergeometric test) |
|                               | High-confidence loci (with syndromic mutations) and different SFARI versions                                                                                                                                                                                                                                                                                                                                                                     | SFARI (gene-scoring module, category S)                                 | Significant enrichment (P≤3.85e-06, Fisher's exact)                                                                              |
| <b>Independent validation</b> | Enrichment of genes affected by <i>de novo</i> ASD disruptive mutations                                                                                                                                                                                                                                                                                                                                                                          | Sanders, et al; O'Roak, et al.; Neale, et al., 2012, <i>Nature</i>      | Significant enrichment (P=0.029, Fisher's exact)                                                                                 |
|                               | Enrichment of genes affected by <i>de novo</i> CNVs in ASD probands                                                                                                                                                                                                                                                                                                                                                                              | Pinto, et al. 2014, AJHG<br>Sanders et al. and Levy et al. 2011, Neuron | Significant enrichment (P=0.01, Fisher's exact)                                                                                  |
|                               | Enrichment of the high-confidence ASD candidate genes with recurrent <i>de novo</i> disruptive mutations                                                                                                                                                                                                                                                                                                                                         | Willsey, A.J. <i>et al. Cell</i> , 2014                                 | Significant enrichment (P=3.8e-3, Fisher's exact)                                                                                |
|                               | Enrichment of genes affected by <i>de novo</i> CNVs associated with ASD patients                                                                                                                                                                                                                                                                                                                                                                 | Noh, H.J. et al. PLoS Genet., 2013                                      | Significant enrichment (P=3.1105e-13, Fisher's exact)                                                                            |
|                               | Enrichment of genes affected by rare ASD CNVs                                                                                                                                                                                                                                                                                                                                                                                                    | Pinto, D. et al., Nature 2010                                           | Significant enrichment (P=0.0475, Fisher's exact)                                                                                |
|                               | Enrichment of rare nonsynonymous mutations                                                                                                                                                                                                                                                                                                                                                                                                       | genome/exome-sequencing in this study                                   | Significant enrichment (P=1.2e-3, hypergeometric test)                                                                           |
|                               | Replication on exome-seq data for >500 patients                                                                                                                                                                                                                                                                                                                                                                                                  | Liu, L. et al. PLoS Genet.                                              | Significant overlap with the candidate loci identified in our sequencing study                                                   |
|                               | 1. SynaptomeDB ( <a href="http://psychiatry.igm.jhmi.edu/SynaptomeDB/">http://psychiatry.igm.jhmi.edu/SynaptomeDB/</a> )<br>2. For the comparisons with previously published sequencing dataset, the control gene set includes a set of 9782 genes with indistinguishable CDS length and GC content from the genes in the module.<br>3. For comparisons involving ASD probands, the same comparisons on unaffected siblings were also performed. |                                                                         |                                                                                                                                  |

**Table S1B. Enrichment test for genes with different types of mutations in ASD probands and unaffected siblings**

| Test for ASD candidate genes                                      |        |                 |             |                    |                                                             |
|-------------------------------------------------------------------|--------|-----------------|-------------|--------------------|-------------------------------------------------------------|
| CNV test                                                          | module | matched control | Fold-change | P (Fisher's exact) | References (PMID)                                           |
| de novo CNV (ASD-union, 2753 genes)                               | 19.33% | 11.27%          | 1.7152      | 0.0124             | 24768552, 21658581, 21658582                                |
| de novo CNV (ASD-intersection, 545 genes)                         | 5.04%  | 2.07%           | 2.435       | 0.0393             | 24768552, 21658581, 21658582                                |
| HC CNV in ASD (203 genes)                                         | 14.29% | 1.20%           | 11.91       | 3.11E-13           | 23754953                                                    |
| de novo CNV (nonASD, 557 genes)                                   | 1.68%  | 2.65%           | 0.634       | 0.7725             | 21658581, 21658582, 22083728                                |
| rare ASD CNV in ASD (407 genes)                                   | 5.04%  | 2.17%           | 2.3226      | 0.0475             | 20531469                                                    |
| <b>de novo SNVs</b>                                               |        |                 |             |                    |                                                             |
| de novo disruptive in proband (67 genes)                          | 2.52%  | 0.54%           | 4.67        | 0.03               | 22495309, 22495306, 22495311                                |
| de novo disruptive in siblings (8 genes)                          | 0.00%  | 0.06%           | 0           | 1                  |                                                             |
| de novo missense in proband (366 genes)                           | 5.04%  | 2.81%           | 1.79        | 0.1543             |                                                             |
| de novo missense in siblings (109 genes)                          | 0.84%  | 0.73%           | 1.15        | 0.5826             |                                                             |
| de novo silent in proband (148 genes)                             | 0.84%  | 1%              | 0.84        | 1                  |                                                             |
| de novo silent in siblings (52 genes)                             | 0      | 0.40%           | 0           | 1                  |                                                             |
| <b>SFARI genes (484 genes)</b>                                    | 21%    | 3.40%           | 6.18        | 5.84E-13           | <a href="https://gene.sfari.org">https://gene.sfari.org</a> |
| HC SFARI genes (category S)                                       | 5.04%  | 0.31%           | 16.26       | 3.85E-06           |                                                             |
| <b>control gene set is matched with CDS length and GC content</b> |        |                 |             |                    |                                                             |
