# Supplementary material for: Integrated systems analysis reveals a molecular network underlying autism spectrum disorders
Source: PubMed Central journal article supplement (PMC4300495; doi:10.15252/msb.20145487), 2014-12-30
Supplement: msb0010-0774-sd16.pdf [file msb0010-0774-sd16.pdf]

**Table S2. Sample Information for DNA-sequencing**

| ID     | AN#      | AGE | SEX | PMI   | ETHNICITY | DIAGNOSIS                   | SEQ TYPE | SOURCE |
|--------|----------|-----|-----|-------|-----------|-----------------------------|----------|--------|
| 133332 | AN03217  | 19  | M   | 18.58 | European  | NA                          | WGS      | ATP    |
| 133350 | AN06420  | 39  | M   | 13.95 | European  | ADI-R                       | WGS      | ATP    |
| 133334 | AN10833  | 22  | M   | 21.47 | European  | NA                          | WGS      | ATP    |
| 111305 | AN11989  | 30  | M   | 16.06 | European  | ADI-R                       | WGS      | ATP    |
| 133337 | AN17450  | 0   | M   | 5     | European  | NA                          | WGS      | ATP    |
| 111291 | AN00764  | 20  | M   | 23.7  | European  | Autism - confirmed by ADI-R | WGS      | ATP    |
| 111297 | AN19511  | 8   | M   | 22.2  | European  | Autism - confirmed by ADI-R | WGS      | ATP    |
| 111302 | AN03345  | 2   | M   | 4     | European  | Autism - confirmed by ADI-R | WGS      | ATP    |
| 133331 | AN07444  | 17  | M   | 30.75 | European  | NA                          | WGS      | ATP    |
| 111301 | AN09730  | 22  | M   | 25    | European  | Autism - confirmed by ADI-R | WGS      | ATP    |
| 111289 | AN16641  | 9   | M   | 27    | European  | ADI-R                       | EXOME    | ATP    |
| 111290 | AN00493  | 27  | M   | 8.3   | European  | ADI-R                       | EXOME    | ATP    |
| 111292 | AN08792  | 30  | M   | 20.3  | European  | ADI-R                       | EXOME    | ATP    |
| 111296 | AN08873  | 5   | M   | 25.5  | European  | ADI-R                       | EXOME    | ATP    |
| 111299 | AN01570  | 18  | F   | 6.75  | European  | ADI-R                       | EXOME    | ATP    |
| 111304 | AN12457  | 29  | F   | 17.83 | European  | ADI-R                       | EXOME    | ATP    |
| 111310 | AN08166  | 28  | M   | 43.25 | European  | ADI-R                       | EXOME    | ATP    |
| 111313 | AN17678  | 11  | M   | -     | European  | ADI-R                       | EXOME    | ATP    |
| 111316 | AN09714  | 60  | M   | 26.5  | European  | Autism - confirmed by ADI-R | EXOME    | ATP    |
| 111317 | AN17254  | 51  | M   | 22.16 | European  | ADI-R                       | EXOME    | ATP    |
| 133328 | HSB-4640 | 8   | M   | 13.8  | European  | Autism-supported by records | EXOME    | ATP    |
| 133341 | AN16115  | 11  | F   | 12.88 | European  | ADI-R                       | EXOME    | ATP    |
| 133344 | AN08043  | 52  | F   | 39.15 | European  | ADI-R                       | EXOME    | ATP    |
| 133346 | AN02456  | 4   | F   | 17.02 | European  | NA                          | EXOME    | ATP    |
| 5403   | #        | 16  | M   | 35    | European  | ADI-R                       | EXOME    | NICHD  |
| 5144   | #        | 7   | M   | 3     | European  | ADI-R                       | EXOME    | NICHD  |
| 5308   | #        | 4   | M   | 21    | European  | ADI-R                       | EXOME    | NICHD  |
| 5302   | #        | 16  | M   | 20    | European  | ADI-R                       | EXOME    | NICHD  |
| 4899   | #        | 14  | M   | 9     | European  | ADI-R                       | EXOME    | NICHD  |
| 4999   | #        | 20  | M   | 14    | European  | ADI-R                       | EXOME    | NICHD  |

**Notes** - ADI-R: autism diagnostic interview, revised; NA: control subjects with no diagnosed autism; WGS: whole-genome sequencing; Exome: exome sequencing; ATP: Autism Tissue Program; NICHD: NICHD Brain and Tissue Bank; PMI: postmortem interval.
