# Supplementary material for: Integrated systems analysis reveals a molecular network underlying autism spectrum disorders
Source: PubMed Central journal article supplement (PMC4300495; doi:10.15252/msb.20145487), 2014-12-30
Supplement: msb0010-0774-sd17.pdf [file msb0010-0774-sd17.pdf]

**Table S3. Information for whole-genome sequencing**

| <b>ID</b>     | <b>133350</b> | <b>111297</b> | <b>133334</b> | <b>133337</b> | <b>111302</b> | <b>111301</b> | <b>133331</b> | <b>111291</b> | <b>133332</b> | <b>111305</b> |
|---------------|---------------|---------------|---------------|---------------|---------------|---------------|---------------|---------------|---------------|---------------|
| <b>Ti/Tv</b>  | 2.027         | 2.025         | 2.030         | 2.030         | 2.032         | 2.026         | 2.031         | 2.026         | 2.13          | 2.10          |
| <b>Cvg*</b>   | 38.3          | 38.7          | 38.6          | 34.7          | 38.4          | 35.9          | 37.2          | 40.4          | 36.2          | 41.9          |
| <b>Array*</b> | 99.28%        | 99.28%        | 99.27%        | 99.25%        | 99.26%        | 99.26%        | 99.28%        | 99.28%        | -             | -             |

- Cvg is the mean coverage for each sample.
- Array is the percentage of agreement with genotyping validation with OminChip.
