# Supplementary material for: Integrated systems analysis reveals a molecular network underlying autism spectrum disorders
Source: PubMed Central journal article supplement (PMC4300495; doi:10.15252/msb.20145487), 2014-12-30
Supplement: msb0010-0774-sd19.pdf [file msb0010-0774-sd19.pdf]

**Table S5. Sample Information for RNA-sequencing**

| <b>Case ID</b> | <b>Age</b> | <b>Sex</b> | <b>PMI</b> | <b>Ethnicity</b> | <b>Ctl ID</b> | <b>Age</b> | <b>Sex</b> | <b>PMI</b> | <b>Ethnicity</b> |
|----------------|------------|------------|------------|------------------|---------------|------------|------------|------------|------------------|
| 5403           | 16         | M          | 35         | European         | 5407          | 16         | M          | 33         | European         |
| 5144           | 7          | M          | 3          | European         | 5391          | 7          | M          | 12         | European         |
| 5308           | 4          | M          | 21         | European         | 4670          | 4          | M          | 17         | European         |
| 5302           | 16         | M          | 20         | European         | 5242          | 15         | M          | 9          | European         |
| 4899           | 14         | M          | 9          | European         | 5163          | 14         | M          | 12         | European         |
| 4999           | 20         | M          | 14         | European         | 4727          | 20         | M          | 5          | European         |
