# Supplementary material for: Integrated systems analysis reveals a molecular network underlying autism spectrum disorders
Source: PubMed Central journal article supplement (PMC4300495; doi:10.15252/msb.20145487), 2014-12-30
Supplement: msb0010-0774-sd20.pdf [file msb0010-0774-sd20.pdf]

**Table S6. Genes showing extreme expression difference (FPKM) in at least one matched case-control pair(s)**

| Symbols | case-4899 | ctl-5163 | case-4999 | ctl-4727 | case-5144 | ctl-5391 | case-5302 | ctl-5242 | case-5308 | ctl-4670 | case-5403 | ctl-5407 | Case-Ctl pairs showing diff. expression |
|---------|-----------|----------|-----------|----------|-----------|----------|-----------|----------|-----------|----------|-----------|----------|-----------------------------------------|
|         | AGE-14    | AGE-14   | AGE-20    | AGE-20   | AGE-7     | AGE-7    | AGE-16    | AGE-15   | AGE-4     | AGE-4    | AGE-16    | AGE-16   |                                         |
| ACTN2   | 8.17378   | 6.91817  | 7.05457   | 7.6857   | 4.85415   | 12.3486  | 7.46995   | 13.5616  | 7.54513   | 9.69953  | 10.2076   | 6.55199  | 5144_5391                               |
| ATP2B2  | 10.4157   | 10.2315  | 14.496    | 2.27459  | 4.07595   | 7.84837  | 1.95087   | 1.29592  | 0.957262  | 12.9955  | 2.83299   | 6.72334  | 4999_4727 5308_4670                     |
| BCAS1   | 54.125    | 59.9034  | 57.4663   | 80.9105  | 45.298    | 63.5851  | 77.5107   | 97.8034  | 100.546   | 49.4591  | 83.5928   | 62.3803  | 5308_4670                               |
| CAMK2A  | 12.4896   | 17.5579  | 24.9935   | 3.8031   | 10.5568   | 11.6632  | 1.94691   | 2.23104  | 1.62797   | 29.614   | 1.83633   | 6.98267  | 4999_4727 5308_4670 5403_5407           |
| CNTNAP4 | 34.1099   | 37.2074  | 52.8401   | 65.2879  | 27.0515   | 35.0873  | 18.6162   | 81.2807  | 68.3625   | 29.7576  | 44.5378   | 29.4967  | 5308_4670                               |
| DGKZ    | 6.60179   | 4.92138  | 7.28702   | 2.62397  | 3.08711   | 7.22943  | 2.03579   | 2.42599  | 2.02202   | 14.8028  | 1.94708   | 3.19701  | 5144_5391                               |
| DLGAP2  | 0.880738  | 0.85067  | 0.866568  | 0.315409 | 0.466513  | 0.964308 | 0.157345  | 0.154299 | 0.079893  | 1.66111  | 0.085811  | 0.351003 | 5308_4670                               |
| DLGAP3  | 1.79048   | 1.13156  | 0.707896  | 0.26221  | 0.446388  | 1.09454  | 0.274824  | 0.117639 | 0.132243  | 1.7777   | 0.168847  | 0.8147   | 5144_5391 5308_4670                     |
| DYNLL1  | 76.9804   | 100.479  | 114.349   | 147.13   | 112.733   | 75.688   | 18.2117   | 133.366  | 95.5138   | 100.619  | 67.9696   | 44.878   | 5302_5242                               |
| GDA     | 5.42175   | 4.82084  | 10.0478   | 2.45284  | 4.35218   | 9.22799  | 0.365664  | 1.55957  | 0.852387  | 24.4891  | 1.01248   | 1.69001  | 4999_4727 5308_4670                     |
| GRIA1   | 6.5753    | 5.24132  | 6.42643   | 3.39868  | 4.6167    | 5.57764  | 0.754103  | 2.04652  | 1.14055   | 14.8272  | 2.1878    | 2.13048  | 5308_4670                               |
| GRIK3   | 1.55601   | 0.80589  | 1.57387   | 0.922747 | 0.631652  | 2.19164  | 0.158799  | 0.79529  | 0.647623  | 3.31867  | 0.60924   | 0.897166 | 5144_5391                               |
| GRIN2A  | 5.43702   | 5.23169  | 12.1565   | 3.92986  | 3.49946   | 5.99765  | 1.41466   | 2.73144  | 0.994802  | 13.798   | 3.74731   | 3.22638  | 5308_4670                               |
| GRIN2B  | 6.06032   | 3.73538  | 5.5023    | 1.38787  | 2.89003   | 4.81559  | 0.350852  | 1.0746   | 0.910705  | 13.5725  | 0.71534   | 1.40033  | 5308_4670                               |
| HTR2C   | 2.48281   | 19.0262  | 0.766865  | 0.64221  | 0.352887  | 0.363268 | 0.381782  | 0.629359 | 0.117263  | 1.48519  | 22.7309   | 31.4639  | 4899_5163 5308_4670                     |
| KCNA4   | 1.37102   | 0.51685  | 0.78718   | 0.265734 | 0.439702  | 0.572336 | 0.066066  | 0.078082 | 0.054512  | 1.17392  | 0.144732  | 0.318205 | 5308_4670                               |
| KCNJ2   | 4.97208   | 11.6348  | 13.5834   | 18.9721  | 19.7206   | 17.288   | 7.30111   | 24.2115  | 21.5645   | 11.8395  | 11.7479   | 5.37666  | 4899_5163                               |
| KCNJ4   | 1.07885   | 0.8044   | 1.28626   | 0.252741 | 0.396522  | 0.785802 | 0.261297  | 0.15163  | 0.119609  | 2.2375   | 0.120816  | 0.295969 | 4999_4727 5308_4670                     |
| LDB3    | 2.6986    | 6.11025  | 3.73788   | 5.926    | 2.29005   | 8.6733   | 4.31096   | 8.16793  | 8.58386   | 4.77803  | 7.49784   | 4.55085  | 5144_5391                               |
| LPL     | 7.36867   | 1.50055  | 1.39253   | 1.42135  | 2.63802   | 0.621972 | 1.45769   | 1.32159  | 0.988848  | 0.84403  | 1.51843   | 2.22148  | 4899_5163                               |
| NRXN2   | 4.87073   | 5.95951  | 4.89019   | 4.46779  | 3.49419   | 9.54515  | 3.97993   | 5.68091  | 6.32916   | 9.73752  | 5.83865   | 5.11209  | 5144_5391                               |
| PGM5    | 0.479049  | 1.85635  | 2.03931   | 2.67337  | 1.90154   | 1.25966  | 0.755508  | 1.98993  | 1.87654   | 1.78705  | 1.34142   | 0.358495 | 4899_5163 5403_5407                     |
| PTPRN   | 3.47961   | 2.13605  | 2.92521   | 0.491405 | 1.04898   | 2.90347  | 0.181454  | 0.30846  | 0.251279  | 6.38684  | 0.303596  | 0.94505  | 4999_4727 5144_5391 5308_4670           |
| S100A3  | 2.56913   | 0.11203  | 0.060789  | 0.081383 | 0.076386  | 0.03406  | 0.178854  | 0.257424 | 0.050422  | 0.04706  | 0.137539  | 1.23705  | 4899_5163 5403_5407                     |
| SCN1A   | 5.38941   | 6.30019  | 15.8115   | 2.74602  | 3.16211   | 3.092    | 1.8294    | 2.09287  | 2.05957   | 5.82705  | 2.78413   | 2.50353  | 4999_4727                               |
| SHANK2  | 1.66051   | 1.73733  | 1.18268   | 0.630883 | 1.05491   | 1.45654  | 0.609728  | 0.376086 | 0.269225  | 3.5049   | 1.36204   | 2.77783  | 5308_4670                               |
| SHANK3  | 1.24115   | 1.35859  | 0.594706  | 0.449257 | 0.537711  | 1.45191  | 1.10618   | 0.413875 | 0.473776  | 1.51758  | 0.684206  | 1.44919  | 5144_5391 5302_5242                     |
| TBR1    | 1.46978   | 1.27778  | 2.82477   | 0.373084 | 0.989652  | 2.2465   | 0.218025  | 0.129242 | 0.108868  | 2.84041  | 0.191095  | 0.399778 | 4999_4727 5144_5391 5308_4670           |
| TJAP1   | 2.31436   | 4.58465  | 3.07065   | 4.04476  | 2.77386   | 6.35728  | 2.97949   | 5.82153  | 5.31939   | 3.97288  | 4.89807   | 3.74644  | 5144_5391                               |
| ZDHHC23 | 1.39532   | 1.2062   | 3.06164   | 0.445495 | 0.987482  | 1.37944  | 0.45738   | 0.282604 | 0.366755  | 2.76498  | 0.825861  | 1.17759  | 4999_4727                               |
